# Supplementary material
Source: publisher site journal article supplement (https://www.kjim.org/upload/media/kjim-2025-171-Supplementary-Table-21.pdf)
Supplement: Supplementary file 1 [file kjim-2025-171-Supplementary-Table-21.pdf]

**Supplementary Table 21. Time persistence effect on acute pancreatitis development following zoster vaccination**

| Time (yr)    | Events, n (%) | aHR (95% CI)                      |                                   |
|--------------|---------------|-----------------------------------|-----------------------------------|
|              |               | Model 1 <sup>a)</sup>             | Model 2 <sup>b)</sup>             |
| < 1          |               |                                   |                                   |
| Unvaccinated | 918 (0.13)    | 1.0 (reference)                   | 1.0 (reference)                   |
| Vaccinated   | 791 (0.11)    | 0.86 (0.78 to 0.95) <sup>c)</sup> | 0.86 (0.78 to 0.94) <sup>c)</sup> |
| 1–2          |               |                                   |                                   |
| Unvaccinated | 974 (0.13)    | 1.0 (reference)                   | 1.0 (reference)                   |
| Vaccinated   | 740 (0.10)    | 0.76 (0.69 to 0.83) <sup>c)</sup> | 0.75 (0.69 to 0.83) <sup>c)</sup> |
| 2–4          |               |                                   |                                   |
| Unvaccinated | 1,375 (0.19)  | 1.0 (reference)                   | 1.0 (reference)                   |
| Vaccinated   | 1,163 (0.16)  | 0.88 (0.82 to 0.95) <sup>c)</sup> | 0.88 (0.82 to 0.95) <sup>c)</sup> |
| 4–6          |               |                                   |                                   |
| Unvaccinated | 774 (0.11)    | 1.0 (reference)                   | 1.0 (reference)                   |
| Vaccinated   | 559 (0.08)    | 0.84 (0.75 to 0.93) <sup>c)</sup> | 0.82 (0.73 to 0.91) <sup>c)</sup> |
| 6–8          |               |                                   |                                   |
| Unvaccinated | 203 (0.03)    | 1.0 (reference)                   | 1.0 (reference)                   |
| Vaccinated   | 171 (0.02)    | 1.07 (0.88 to 1.32)               | 1.01 (0.83 to 1.25)               |
| ≥ 8          |               |                                   |                                   |
| Unvaccinated | 7 (0.0009)    | 1.0 (reference)                   | 1.0 (reference)                   |
| Vaccinated   | 5 (0.0007)    | 0.98 (0.31 to 3.11)               | 0.95 (0.30 to 3.06)               |

aHR, adjusted hazard ratio; CI, confidence interval.

<sup>a)</sup>Models 1: adjusted for age (50–54, 55–59, 60–64, and ≥ 65 years) and sex.<sup>b)</sup>Model 2: adjusted for age (50–54, 55–59, 60–64, and ≥ 65 years); sex; household income (low income, middle income, and high income); region of residence (urban and rural); Charlson comorbidity index (0, 1, and ≥ 2); obesity (underweight [ $< 18.5 \text{ kg/m}^2$ ], normal [ $18.5\text{--}22.9 \text{ kg/m}^2$ ], overweight [ $23.0\text{--}24.9 \text{ kg/m}^2$ ], and obese [ $\geq 25.0 \text{ kg/m}^2$ ]); blood pressure (systolic blood pressure  $< 140 \text{ mmHg}$  and diastolic blood pressure  $< 90 \text{ mmHg}$  and systolic blood pressure  $\geq 140 \text{ mmHg}$  or diastolic blood pressure  $\geq 90 \text{ mmHg}$ ); fasting blood glucose ( $< 100$  and  $\geq 100 \text{ mg/dL}$ ); glomerular filtration rate ( $< 60$ ,  $60\text{--}89$ , and  $\geq 90 \text{ mL/min/1.73 m}^2$ ); smoking status (non-, ex-, and current smoker); alcohol consumption (drinks;  $< 1$ ,  $1\text{--}2$ ,  $3\text{--}4$ , and  $\geq 5$  days per week); aerobic physical activity (sufficient and insufficient); and history of medication use for coronary artery disease, diabetes mellitus, dyslipidemia, and hypertension.<sup>c)</sup>Significant differences ( $p < 0.05$ ).
